# Supplementary material for: Excision of an Active CACTA-Like Transposable Element From DFR2 Causes Variegated Flowers in Soybean [Glycine max (L.) Merr.]
Source: Oxford University Press journal article supplement (doi:10.1534/genetics.109.107904), 2009-11-07
Supplement: 107904_si.pdf [file 107904_si.pdf]

# GENETICS

Supporting Information

<http://www.genetics.org/cgi/content/full/genetics.109.107904/DC1>

**Excision of an Active CACTA-Like Transposable Element  
From *DFR2* Causes Variegated Flowers in Soybean  
[*Glycine max* (L.) Merr.]**

**Min Xu, Hargeet K. Brar, Sehiza Grosic, Reid G. Palmer  
and Madan K. Bhattacharyya**

Copyright © 2009 by the Genetics Society of America  
DOI: 10.1534/genetics.109.107904

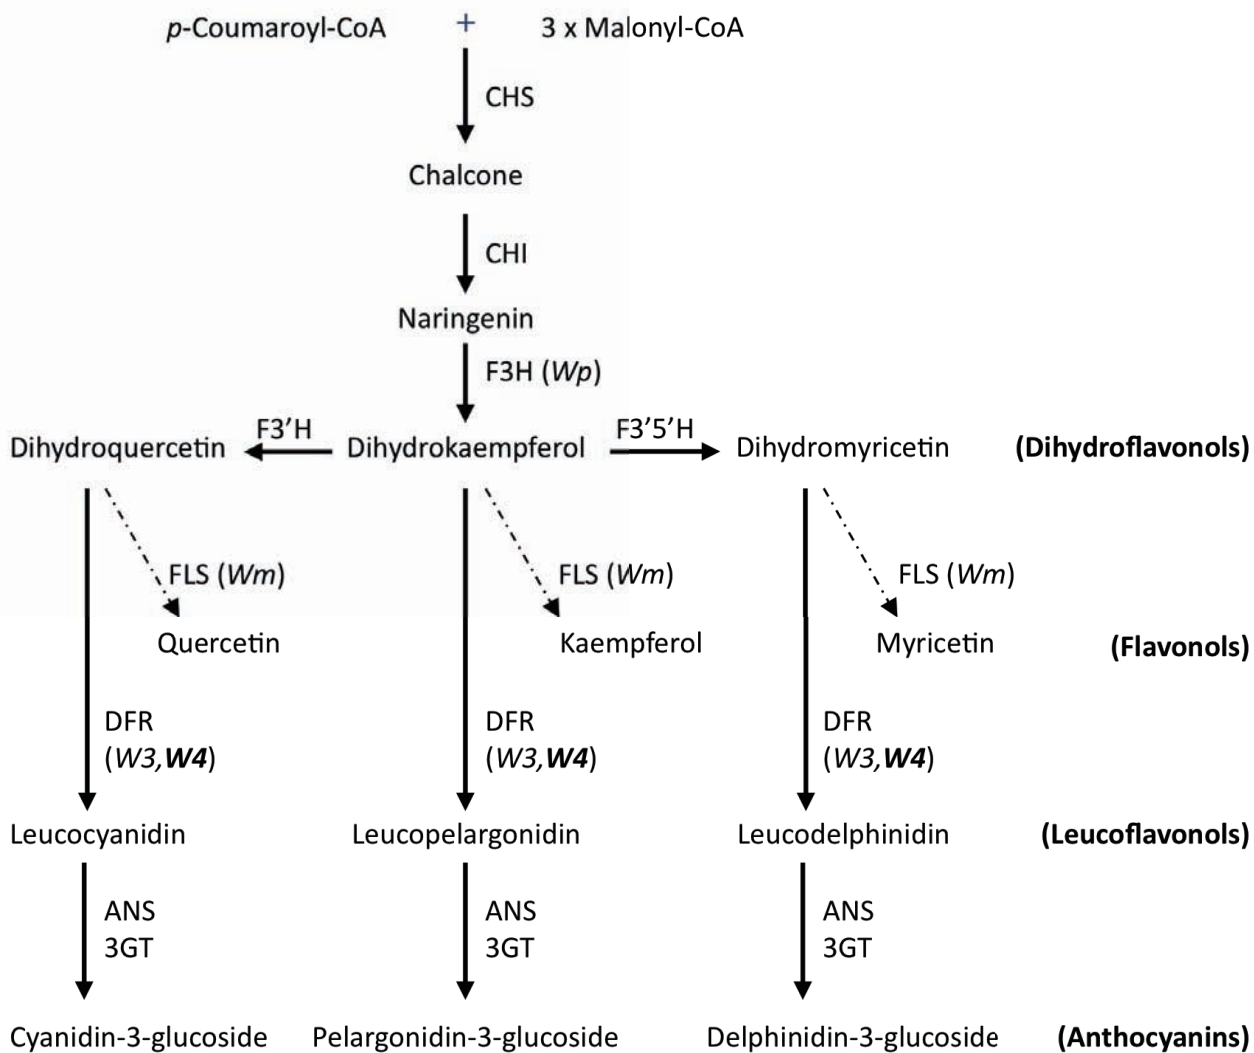

FIGURE S1.—Anthocyanin biosynthesis pathway involved in flower color development. CHS, Chalcone Synthase; CHI, Chalcone Isomerase; F3H, Flavanone 3-Hydroxylase; F3'5'H, Flavanone 3',5'-Hydroxylase; F3'H, Flavanone 3'-Hydroxylase; DFR, Dihydroflavonol-4-Reductase; ANS, Anthocyanidin Synthase; 3GT, 3-Glucose Transferase; FLS, Flavonol Synthase

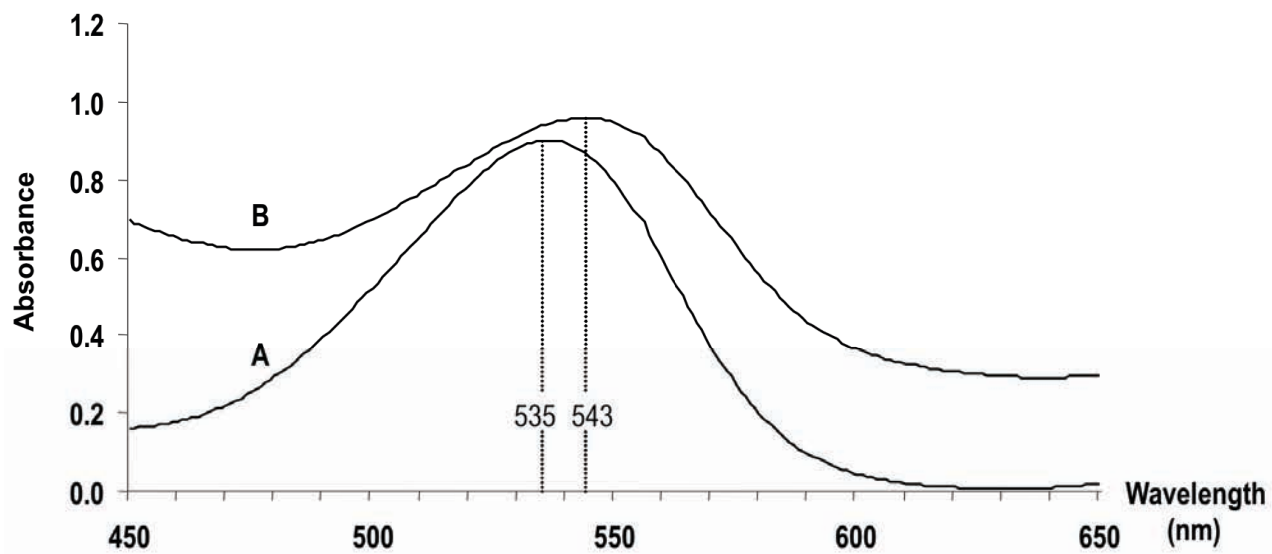

FIGURE S2.—Absorption spectra of anthocyanins extracted from immature flowers of the cultivar Harosoy. (A) Absorption spectrum of anthocyanin extracts in methanol-HCl, the absorption peak is at 535 nm. (B) Absorption spectrum of anthocyanin aglycones hydrolyzed by boiling 30 minutes, the absorption peak shifted 8 nm to 543 nm.

```

DFR2       MGSSSASESVCVTGASGFIGSWLMRLIERGYTVRATVVRDPANMKKVKHLVELPGAATKL 60
DFR1       MG--SASESVCVTGASGFIGSWLMRLIERGYTVRATVVRDPVNMKKVKHLVELPGAATKL 58
**   ****;*****;*****;*****;*****;*****;*****;*****;****

DFR2       SLWKADLAQEGSFDEAIKGCCTGVFHVATPMDFDKDPENEVIKPTINGLLDIMKACVKAK 120
DFR1       SLWKADLAEEGSFDEAIKGCCTGVFHVATPMDFESKDPENEVIKPTINGVLDIMKACLKAK 118
*****;*****;*****;*****;*****;*****;*****;*****;****

DFR2       TVRRLVFTSSAGTVDVTEHPNPVIDENCWSDVDFCTRVKMTGWMYFVSKTLAEQEAWKYA 180
DFR1       TVRRLIFTSSAGTLNVIERQKPVFDDTCWSDVEFCRRVKMTGWMYFVSKTLAEKEAWKFA 178
****;*****;****;****;****;****;****;****;****;****;****;*

DFR2       KEHNIDFISVIPPLVVGPFMLPMTMPPSLITALSLITGNESHYHIIKQGQFVHLDLCLGH 240
DFR1       KEQGLDFITIIIPPLVVGPFMLPMTMPPSLITALSPITGNEDHYSIIKQGQFVHLDLCLAH 238
**;.****;*****;*****;***** ***** * *****;*****;*

DFR2       IFVFENPKAEGRYICCSHEATIHDIAKLLNQKYPEYNVLTkFKNIPDELDIKfSSKKIT 300
DFR1       IFLFEPEVEGRYICSACDATIHDIAKLINQKYPEYKVPtkFKNIPDQLELVRfSSKKIT 298
**;**;.****;.****;*****;*****;****;****;****;*****;***;*****

DFR2       DLGFKFKYSLEDFTGAVETCREKGLLPKPEETTVNNELLPKPAETTVNDTMQK 354
DFR1       DLGFKFKYSLEDMYTGAIIDTCRDKGLLPKPAEK---GLFtkpGETPVN-AMHK 347
*****;*****;****;***** *      *;.****.*** **;*

```

FIGURE S3.—Alignment of DFR1 with DFR2. “\*” represents identical residues; “:” means conserved substitutions between similar residues; “.” indicates the semi-conserved substitutions between similar residues.

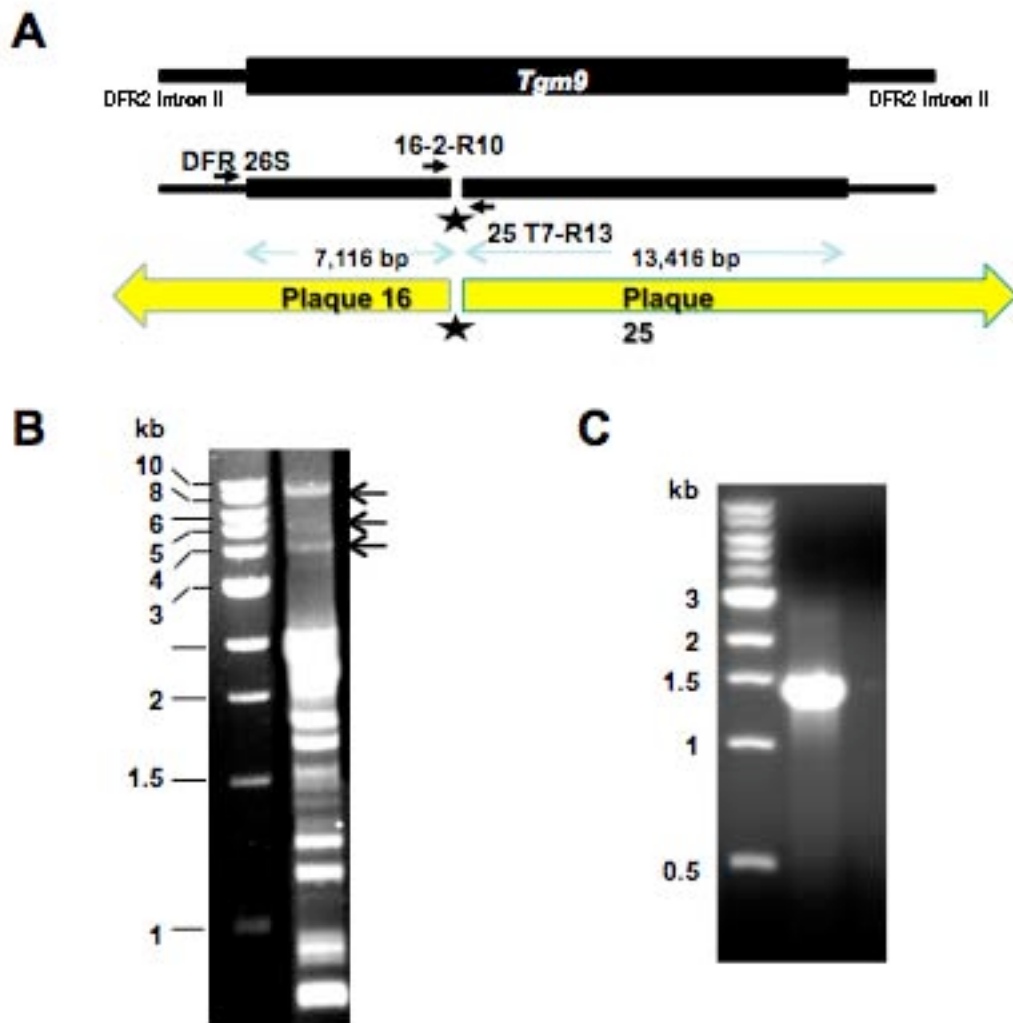

FIGURE S4.—PCR and sequencing strategies in obtaining a missing sequence of *Tgm9*. (A) Diagrammatic presentation of plaques 16 and 25 that were used to obtain most part of the *Tgm9* sequence. (B) Long-range (LR) PCR using primers DFR26S (5'-CAAGGACCCTGAGGTATGT-TGATCAT-3') and 25 T7-R13 (5'-CCCACACAAACGTATTTCTCGAAC-3') was applied to amplify the fragments including *DFR2* intron II and part of *Tgm9* as shown in (A). (C) Sub-PCR of the LR PCR products (shown by arrows in B). Sub-PCR product obtained by using primers 16-2-R10 (5'-GGTTCCTGGCGCTTCCAGTGAAG-3') and 25T7-R13 was used to obtain the sequence of the gap region shown by a black star in (A).

***Tgmw4m***



|       |                                   |                                     |
|-------|-----------------------------------|-------------------------------------|
| T322  | CGTATCATATTTATATATTTTATAGGTAATAAT | <u>AA</u> TACATGAATGCTTATATTTTTT    |
| 58-1  | CGTATCATATTTATATATTTTATAGGTAATAAT | ACATGAATGCTTATATTTTTT               |
| 58-18 | CGTATCATATTTATATATTTTATAGGTAATA   | <b>AA</b> TACATGAATGCTTATATTTTTT    |
| 58-9  | CGTATCATATTTATATATTTTATAGGTAATAAT | <b>AT</b> ACATGAATGCTTATATTTTTT     |
| 58-4  | CGTATCATATTTATATATTTTATAGGTAATAAT | <b>T AA</b> TACATGAATGCTTATATTTTTT  |
| 58-6  | CGTATCATATTTATATATTTTATAGGTAATAAT | <b>AT</b> ACATGAATGCTTATATTTTTT     |
| 58-13 | CGTATCATATTTATATATTTTATA          | TACATGAATGCTTATATTTTTT              |
| 58-21 | CGTATCATATTTATATATTTTATAGGTAATAAT | <b>T AA</b> TACATGAATGCTTATATTTTTT  |
| 58-7  | CGTATCATATTTATATATTTTATAGGTAATAAT | <b>AT AA</b> TACATGAATGCTTATATTTTTT |
| 58-5  | CGTATCATATTTATATATTTTATAGGTAATAAT | <b>AT</b> ACATGAATGCTTATATTTTTT     |
| T321  | CGTATCATATTTATATATTTTATAGGTAATAAT | <b>AT AA</b> TACATGAATGCTTATATTTTTT |
| T369  | CGTATCATATTTATATATTTTATAGGTAATAAT | CATGAATGCTTATATTTTTT                |
| WT    | CGTATCATATTTATATATTTTATAGGTAATAAT | ACATGAATGCTTATATTTTTT               |
|       | *****                             | *****                               |

FIGURE S5.—Unique footprints left behind by *Tgm9* during germinal reversion. Germinal revertants from nine families identified in Figure 7a and two intermediate germinal revertants T321 (*w4-dp*) and T369 (*w4-p*) were selected for determining footprints left behind by *Tgm9* in *DFR2* intron II through PCR by compare to the wild-type *DFR2* (WT) from cv. Williams 82. Nucleotides representing the target site duplication are underlined. Footprint nucleotides left by *Tgm9* germinal excision are in bold font.

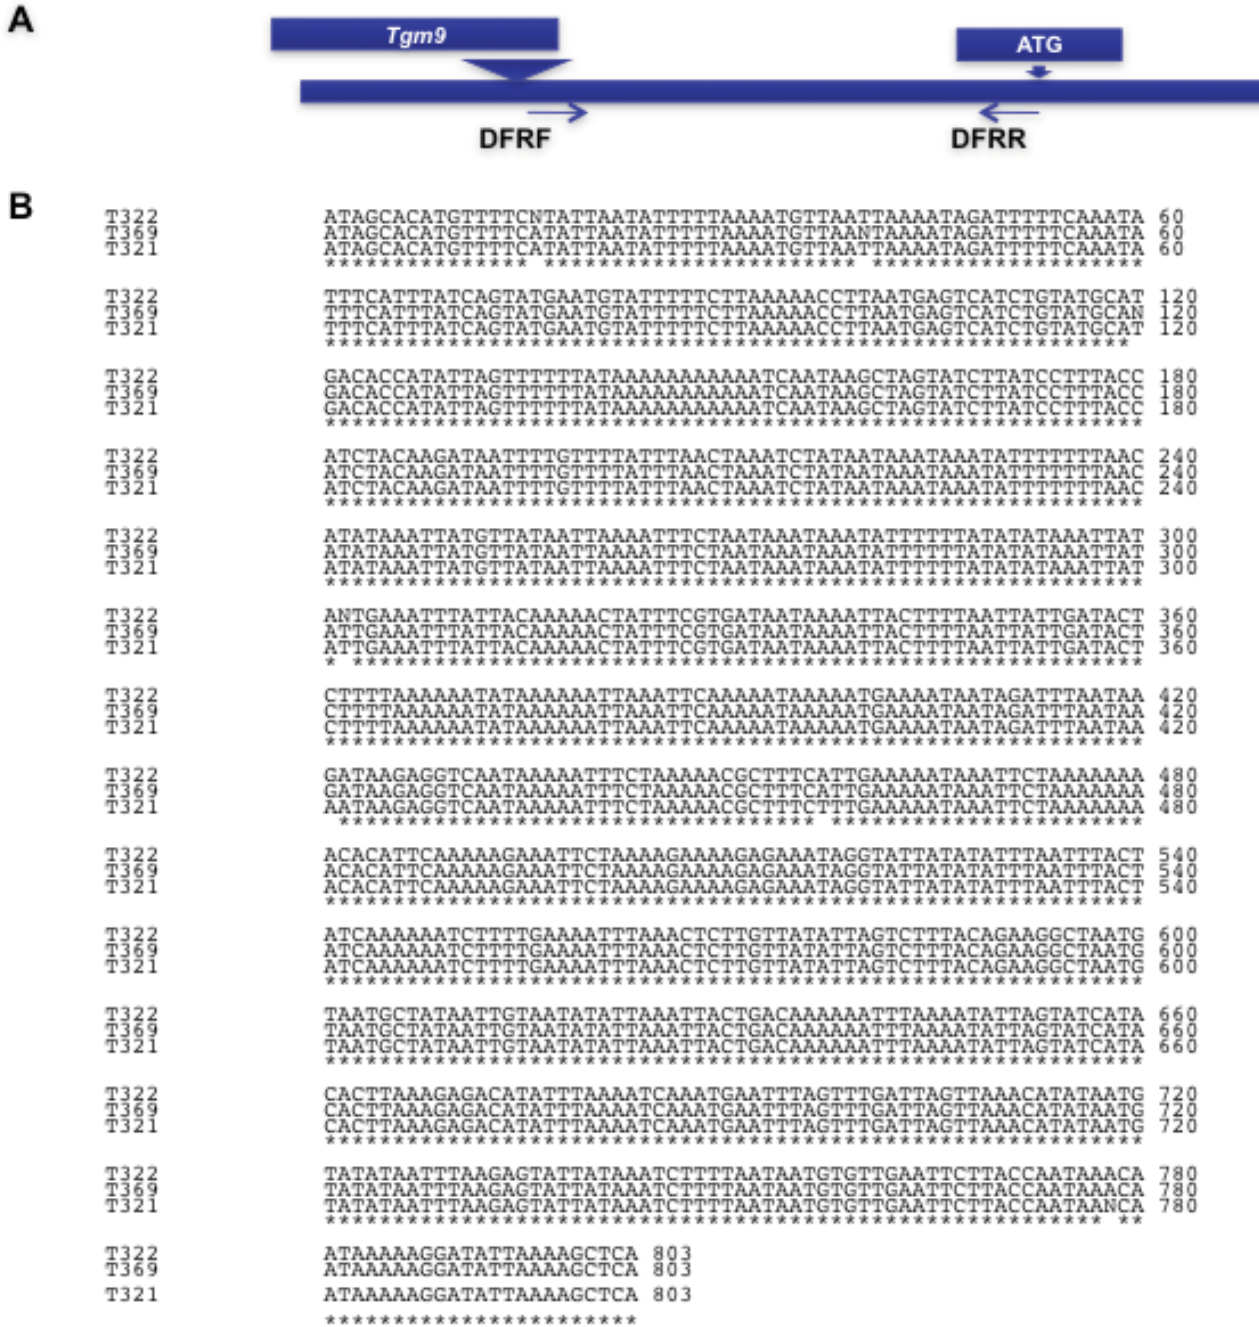

FIGURE S6. —Promoters of *w4-dp* (T321) and *w4-p* (T369) alleles were intact following insertion of *Tgm9*. (A) Schematic representation of the promoter region amplified by PCR is shown. Inverted triangle showed the *Tgm9* insertion site. (B) PCR amplified promoter sequences of parental line T322 (*w4-m*) and two stable mutants *w4-dp* (T321) and *w4-p* (T369) are compared. Primer DFRF, CCTATGCCATGTGAGAATAAAGCAG; Primer DFRR, CCGTATGAAGTGGGTGCTTTTATAG.

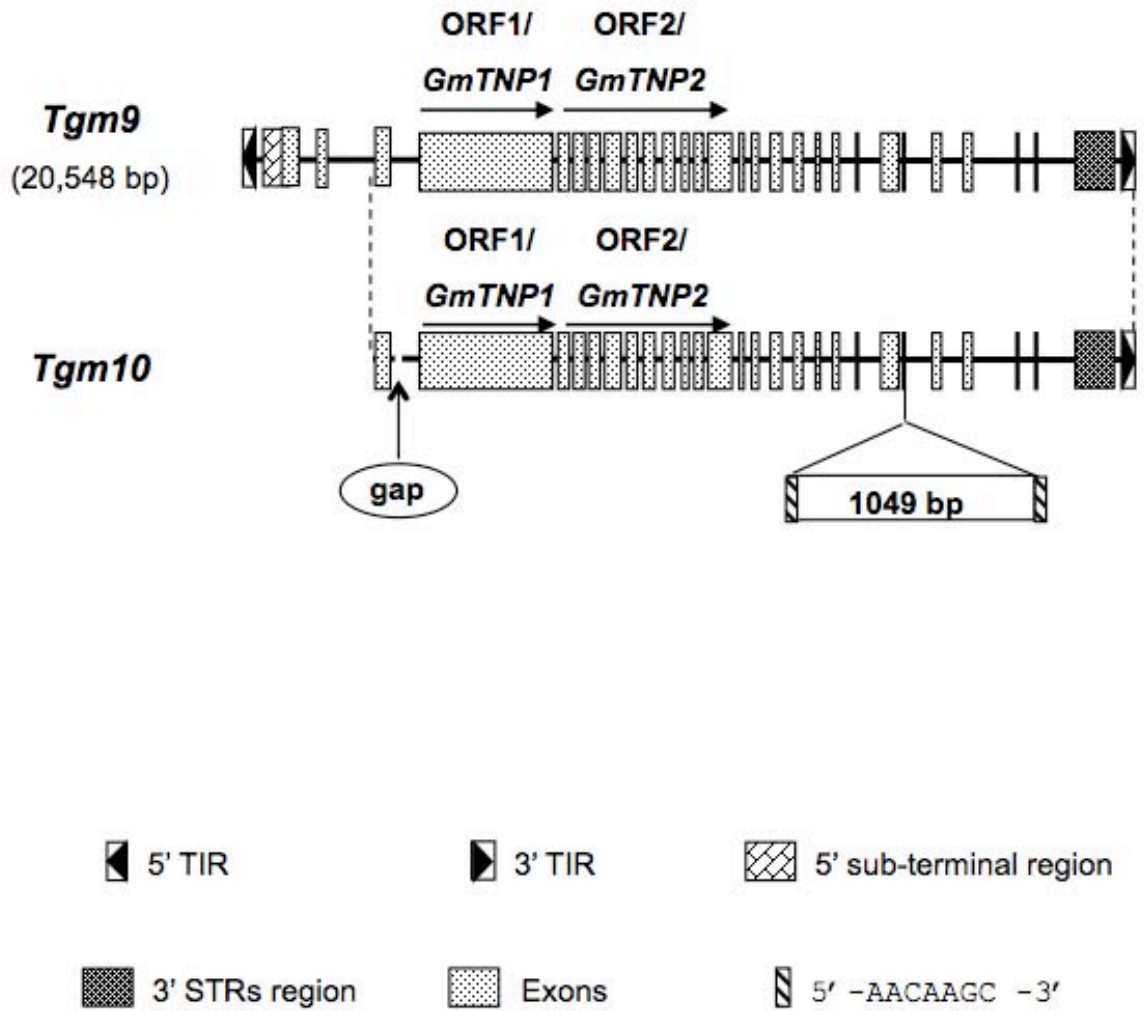

FIGURE S7.—Schematic representation of *Tgm10*. *Tgm10* is located at the 3' end of Scaffold\_57. Except for a ~4100bp deletion in 5' end, a gap in 5'end, and a 1049 bp insertion flanked with a 7 bp direct repeat in exon XXIII, *Tgm10* is 99% identical to *Tgm9* element.



**TABLE S1**  
**Primers used in this study**

| Primer <sup>a</sup> | Sequence                              |
|---------------------|---------------------------------------|
| ANS1S               | 5'-ATGCACCTTGGTGAACCATGG-3'           |
| DFR1S               | 5'-ATCTTGCTGAAGAGGGAAGC-3'            |
| DFR2S               | 5'-ACAACGAGAGAGAGAACATG-3'            |
| DFR3S               | 5'-AGCCTACAATAAACGGATTG-3'            |
| DFR4S               | 5'-CCCGTTCTTCTATCTTTTTCTG-3'          |
| Tn3'1S              | 5'-GGTTGCAGGAGAAAACCGTCTTAGTATGTC-3'  |
| Tn3'2S              | 5'-CGGTTTTTCGTAACAATCGTC-3'           |
| P1                  | 5'CCCAATCCAAGCTGCGACCTTCAAAG-3'       |
| P3                  | 5'-GGACGAGCCTTTCATCATGGCAGCAC-3'      |
| ANS1R               | 5'-AATGCTCTTGTACTTGCCGTTG-3'          |
| DFR1R               | 5'-TGTACATGTCCTCTAAGCTG-3'            |
| DFR2R               | 5'-TCCCTCTTGAGCAAGATCAG-3'            |
| DFR3R               | 5'-ATGATATGGTAATGGGACTC-3'            |
| DFR4R               | 5'-GGACAAAGACAATGCAGGTCCACATCGAAG-3'  |
| Tn3'1R              | 5'-GACATTCATGTATTCACTAGTACAAATAAAG-3' |
| P2                  | 5'-CGCCAGAACCCACTTTGTAGCGTGAC-3'      |
| P4                  | 5'-GCTCCCATGTTTGCTGCTCCATACCA-3'      |
| P5                  | 5'-CTGATGCAAGTATGCTCCTAAGTAC-3'       |

<sup>a</sup> Primers used for sequencing the element are not listed here. ANS1F and ANS1R were designed from a partial coding sequence of an *ANS* gene identified from soybean seed coats (AF325853). DFR1F and DFR1R were designed according to the consensus sequence of three legume *DFR* genes (AF167556 from *G. max*; AF117263 from *Lotus corniculatus*; and AY389346 from *Medicago truncatula*).

**TABLE S2****Probes used in this study**

| Probe <sup>a</sup>       | Description                                                                                                                                                      |
|--------------------------|------------------------------------------------------------------------------------------------------------------------------------------------------------------|
| <i>ANS</i> partial cDNA  | cDNA fragment amplified from purple petals of T322 using ANS1F and ANS1R primers.                                                                                |
| <i>F3H</i>               | An <i>F3H</i> EST clone (BM093886) provided by Dr. R. C. Shoemaker (Ames, IA)                                                                                    |
| <i>DFR2</i> partial cDNA | cDNA fragment amplified from petals of T322 using DFR1F and DFR1R primers.                                                                                       |
| DFR 5'                   | cDNA fragment amplified from petals of T322 using DFR2S and DFR2R primers.                                                                                       |
| DFR3'                    | cDNA fragment amplified from petals of T322 using DFR3S and DFR3R primers.                                                                                       |
| <i>Tgm9</i> 3' end       | PCR fragment amplified using primers TN3'2S and TN3'1R from a lambda clone containing the <i>w4-m</i> allele, isolated from the 1st T322 lambda genomic library. |

<sup>a</sup> All the probes were labeled with  $\alpha$ -<sup>32</sup>P-dATP using Primer-it II randomly labeling kit (Stratagene, La Jolla, CA).

**TABLE S3****Polymorphic sequences between *Tgm9* and *Tgmt\****

| Nucleotide position in <i>Tgm9</i> | Nucleotide in <i>Tgm9</i> | Nucleotide in <i>Tgmt*</i> <sup>a</sup> |
|------------------------------------|---------------------------|-----------------------------------------|
| 293 (5' STR Exon 1)                | T                         | Y                                       |
| 746 (Intron 1)                     | C                         | Y                                       |
| 920 (Intron 2)                     | C                         | Y                                       |
| 1645 (Intron 2)                    | T                         | C                                       |
| 2043 (Intron 2)                    | T                         | C                                       |
| 2192 (Intron 2)                    | T                         | A                                       |
| 2146 (Intron 2)                    | T                         | C                                       |
| 2923 (Intron 2)                    | T                         | -                                       |
| 4969 (Intron 3)                    | A                         | G                                       |
| 5129 (Intron 3)                    | T                         | C                                       |
| 5272 (Intron 3)                    | T                         | -                                       |
| 5715 (Intron 3)                    | T                         | C                                       |
| 5851 (Intron 3)                    | T                         | -                                       |
| 5863 (Intron 3)                    | T                         | -                                       |
| 5999 (Intron 3)                    | T                         | C                                       |
| 6651 (Exon 4)                      | A                         | G                                       |
| 6819 (Exon 4)                      | C                         | Y                                       |
| 8010 (Exon 4)                      | G                         | R                                       |
| 8019 (Exon 4)                      | C                         | Y                                       |
| 8078 (Exon 4)                      | C                         | Y                                       |
| 13359 (Intron 16)                  | T                         | C                                       |
| 13524 (Exon 17)                    | A                         | G                                       |
| 13616 (Exon 17)                    | A                         | G                                       |
| 13904 (Exon 18)                    | G                         | A                                       |
| 15519 (Intron 21)                  | T                         | C                                       |
| 17169 (Exon25)                     | A                         | G                                       |

<sup>a</sup> "-" represents nucleotide missing

**TABLE S4****Comparison of 3' terminal inverted repeats among soybean transposable elements**

| Transposon          | 3' TIR <sup>a</sup>                           | Identity to <i>Tgm9</i> |
|---------------------|-----------------------------------------------|-------------------------|
| <i>Tgm9</i>         | 5'- <b>CACTACTACAAATAAAGCTTTTTAAGTCGG</b> -3' | 100%                    |
| <i>Tgmt*</i>        | 5'- <b>CACTACTACAAATAAAGCTTTTTAAGTCGG</b> -3' | 100%                    |
| <i>Tgm-express1</i> | 5'- <b>CACTACTACAAAAGAGGTTTTTTAAGTCGG</b> -3' | 87%                     |
| <i>Tgm1</i>         | 5'- <b>CACTATTACAAAAAGTAGTTTTAACATCGG</b> -3' | 70%                     |
| <i>Tgm6</i>         | 5'- <b>CACTACTACAAAAGCAGTTTTAACATCGA</b> -3'  | 70%                     |

<sup>a</sup> Nucleotides in bold are identical to the ones in *Tgm9* 3'TIR.
