# Supplementary material for: Excision of an Active CACTA-Like Transposable Element From DFR2 Causes Variegated Flowers in Soybean [Glycine max (L.) Merr.]
Source: Oxford University Press journal article supplement (doi:10.1534/genetics.109.107904), 2009-11-07
Supplement: figures1.pdf [file figures1.pdf]

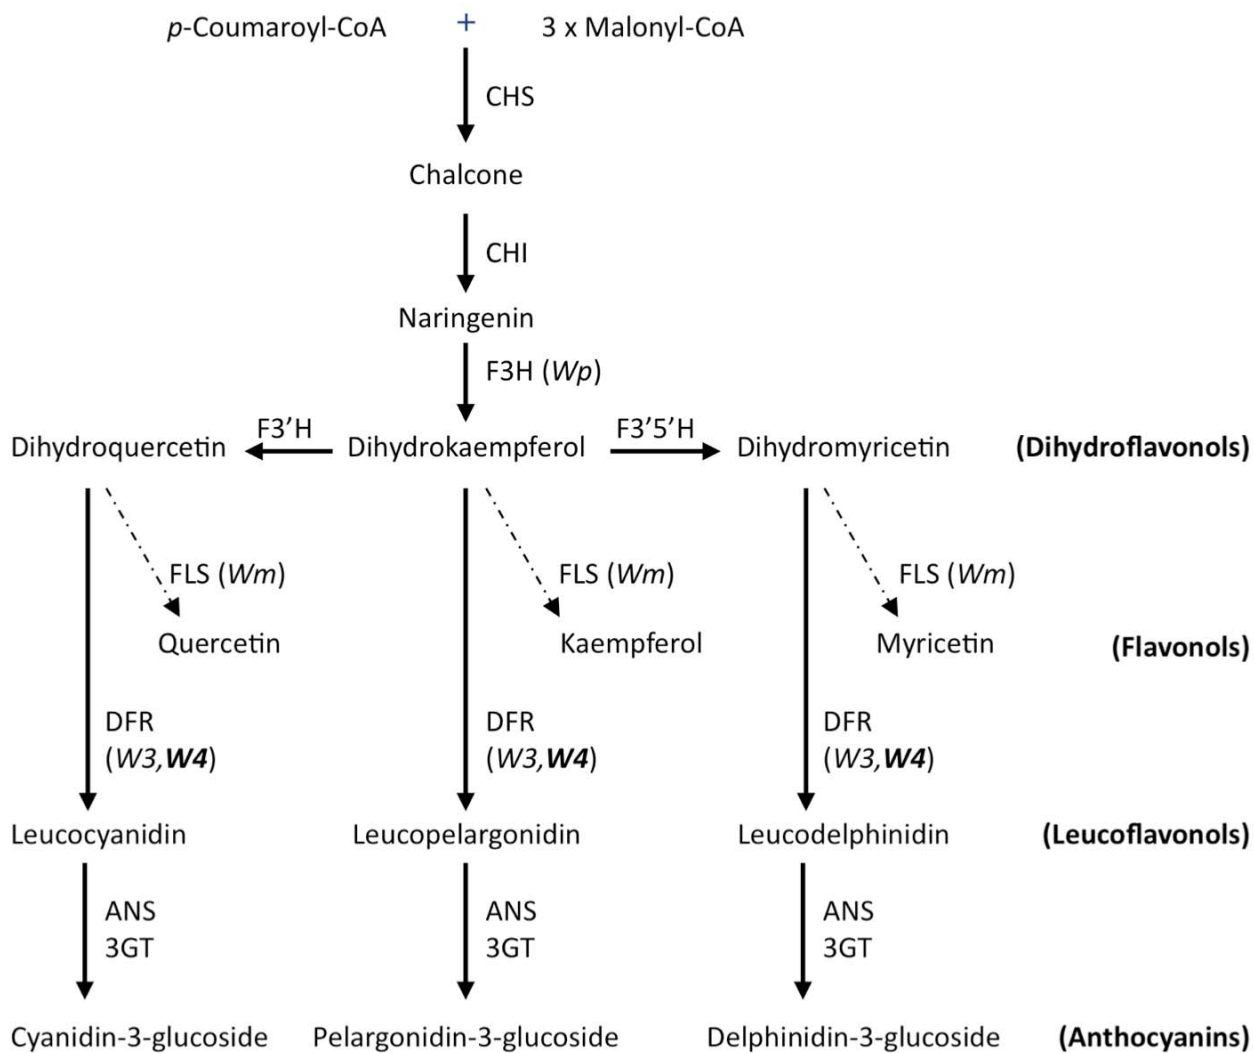

FIGURE S1.—Anthocyanin biosynthesis pathway involved in flower color development. CHS, Chalcone Synthase; CHI, Chalcone Isomerase; F3H, Flavanone 3-Hydroxylase; F3'5'H, Flavonoid 3'5'-Hydroxylase; F3'H, Flavonoid 3'-Hydroxylase; DFR, Dihydroflavonol-4-Reductase; ANS, Anthocyanidin Synthase; 3GT, 3- Glucose Transferase; FLS, Flavonol Synthase
