# Supplementary material for: Excision of an Active CACTA-Like Transposable Element From DFR2 Causes Variegated Flowers in Soybean [Glycine max (L.) Merr.]
Source: Oxford University Press journal article supplement (doi:10.1534/genetics.109.107904), 2009-11-07
Supplement: figures2.pdf [file figures2.pdf]

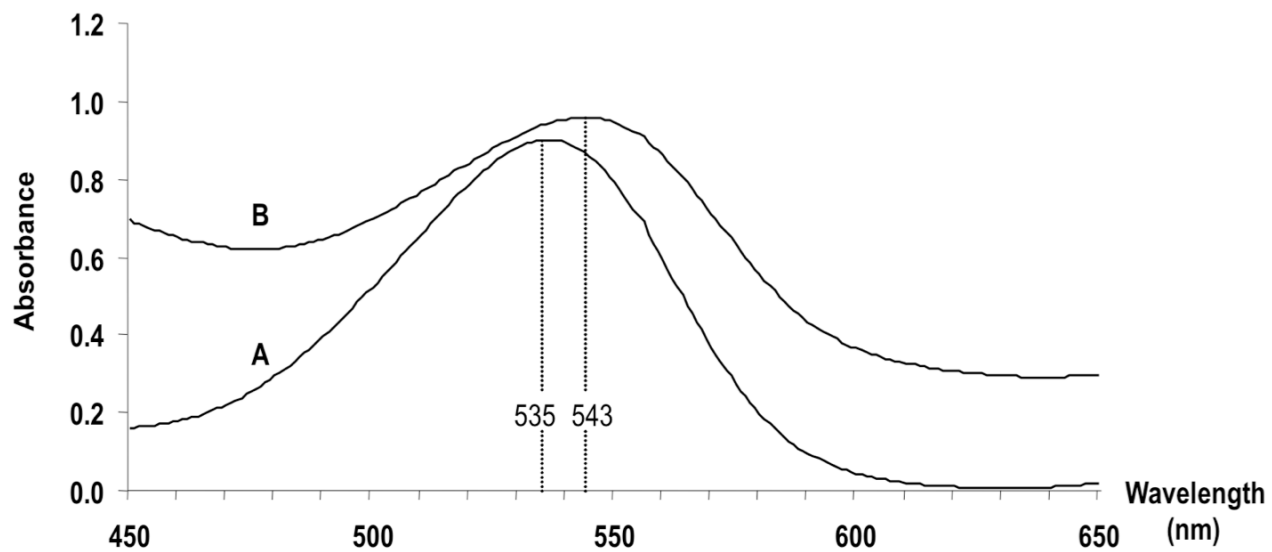

FIGURE S2.—Absorption spectra of anthocyanins extracted from immature flowers of the cultivar Harosoy. (A) Absorption spectrum of anthocyanin extracts in methanol-HCl, the absorption peak is at 535 nm. (B) Absorption spectrum of anthocyanin aglycones hydrolyzed by boiling 30 minutes, the absorption peak shifted 8 nm to 543 nm.
