# Supplementary material for: Excision of an Active CACTA-Like Transposable Element From DFR2 Causes Variegated Flowers in Soybean [Glycine max (L.) Merr.]
Source: Oxford University Press journal article supplement (doi:10.1534/genetics.109.107904), 2009-11-07
Supplement: figures4.pdf [file figures4.pdf]

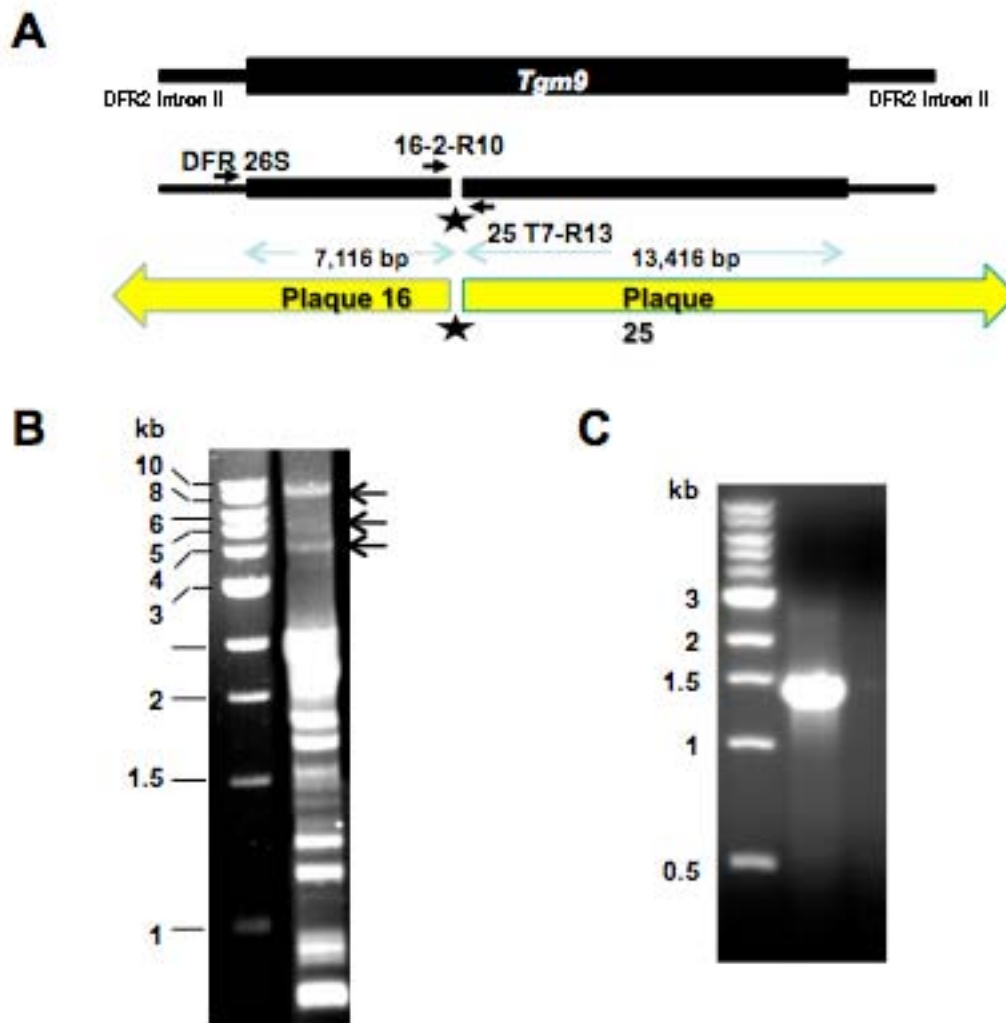

FIGURE S4.—PCR and sequencing strategies in obtaining a missing sequence of *Tgm9*. (A) Diagrammatic presentation of plaques 16 and 25 that were used to obtain most part of the *Tgm9* sequence. (B) Long-range (LR) PCR using primers DFR26S (5'-CAAGGACCCTGAGGTATGT-TGATCAT-3') and 25 T7-R13 (5'-CCCACACAAACGTATTTCTCGAAC-3') was applied to amplify the fragments including *DFR2* intron II and part of *Tgm9* as shown in (A). (C) Sub-PCR of the LR PCR products (shown by arrows in B). Sub-PCR product obtained by using primers 16-2-R10 (5'-GGTTCCTGGCGCTTCCAGTGAAG-3') and 25T7-R13 was used to obtain the sequence of the gap region shown by a black star in (A).
