# Supplementary material for: Excision of an Active CACTA-Like Transposable Element From DFR2 Causes Variegated Flowers in Soybean [Glycine max (L.) Merr.]
Source: Oxford University Press journal article supplement (doi:10.1534/genetics.109.107904), 2009-11-07
Supplement: figures5.pdf [file figures5.pdf]

***Tgmw4m***



|       |                                   |                                     |
|-------|-----------------------------------|-------------------------------------|
| T322  | CGTATCATATTTATATATTTTATAGGTAATAAT | <u>AA</u> TACATGAATGCTTATATTTTTT    |
| 58-1  | CGTATCATATTTATATATTTTATAGGTAATAAT | ACATGAATGCTTATATTTTTT               |
| 58-18 | CGTATCATATTTATATATTTTATAGGTAATA   | <b>AA</b> TACATGAATGCTTATATTTTTT    |
| 58-9  | CGTATCATATTTATATATTTTATAGGTAATAAT | <b>AT</b> ACATGAATGCTTATATTTTTT     |
| 58-4  | CGTATCATATTTATATATTTTATAGGTAATAAT | <b>T AA</b> TACATGAATGCTTATATTTTTT  |
| 58-6  | CGTATCATATTTATATATTTTATAGGTAATAAT | <b>AT</b> ACATGAATGCTTATATTTTTT     |
| 58-13 | CGTATCATATTTATATATTTTATA          | TACATGAATGCTTATATTTTTT              |
| 58-21 | CGTATCATATTTATATATTTTATAGGTAATAAT | <b>T AA</b> TACATGAATGCTTATATTTTTT  |
| 58-7  | CGTATCATATTTATATATTTTATAGGTAATAAT | <b>AT AA</b> TACATGAATGCTTATATTTTTT |
| 58-5  | CGTATCATATTTATATATTTTATAGGTAATAAT | <b>AT</b> ACATGAATGCTTATATTTTTT     |
| T321  | CGTATCATATTTATATATTTTATAGGTAATAAT | <b>AT AA</b> TACATGAATGCTTATATTTTTT |
| T369  | CGTATCATATTTATATATTTTATAGGTAATAAT | CATGAATGCTTATATTTTTT                |
| WT    | CGTATCATATTTATATATTTTATAGGTAATAAT | ACATGAATGCTTATATTTTTT               |
|       | *****                             | *****                               |

FIGURE S5.—Unique footprints left behind by *Tgm9* during germinal reversion. Germinal revertants from nine families identified in Figure 7a and two intermediate germinal revertants T321 (*w4-dp*) and T369 (*w4-p*) were selected for determining footprints left behind by *Tgm9* in *DFR2* intron II through PCR by compare to the wild-type *DFR2* (WT) from cv. Williams 82. Nucleotides representing the target site duplication are underlined. Footprint nucleotides left by *Tgm9* germinal excision are in bold font.
