# Supplementary material for: Excision of an Active CACTA-Like Transposable Element From DFR2 Causes Variegated Flowers in Soybean [Glycine max (L.) Merr.]
Source: Oxford University Press journal article supplement (doi:10.1534/genetics.109.107904), 2009-11-07
Supplement: figures6.pdf [file figures6.pdf]

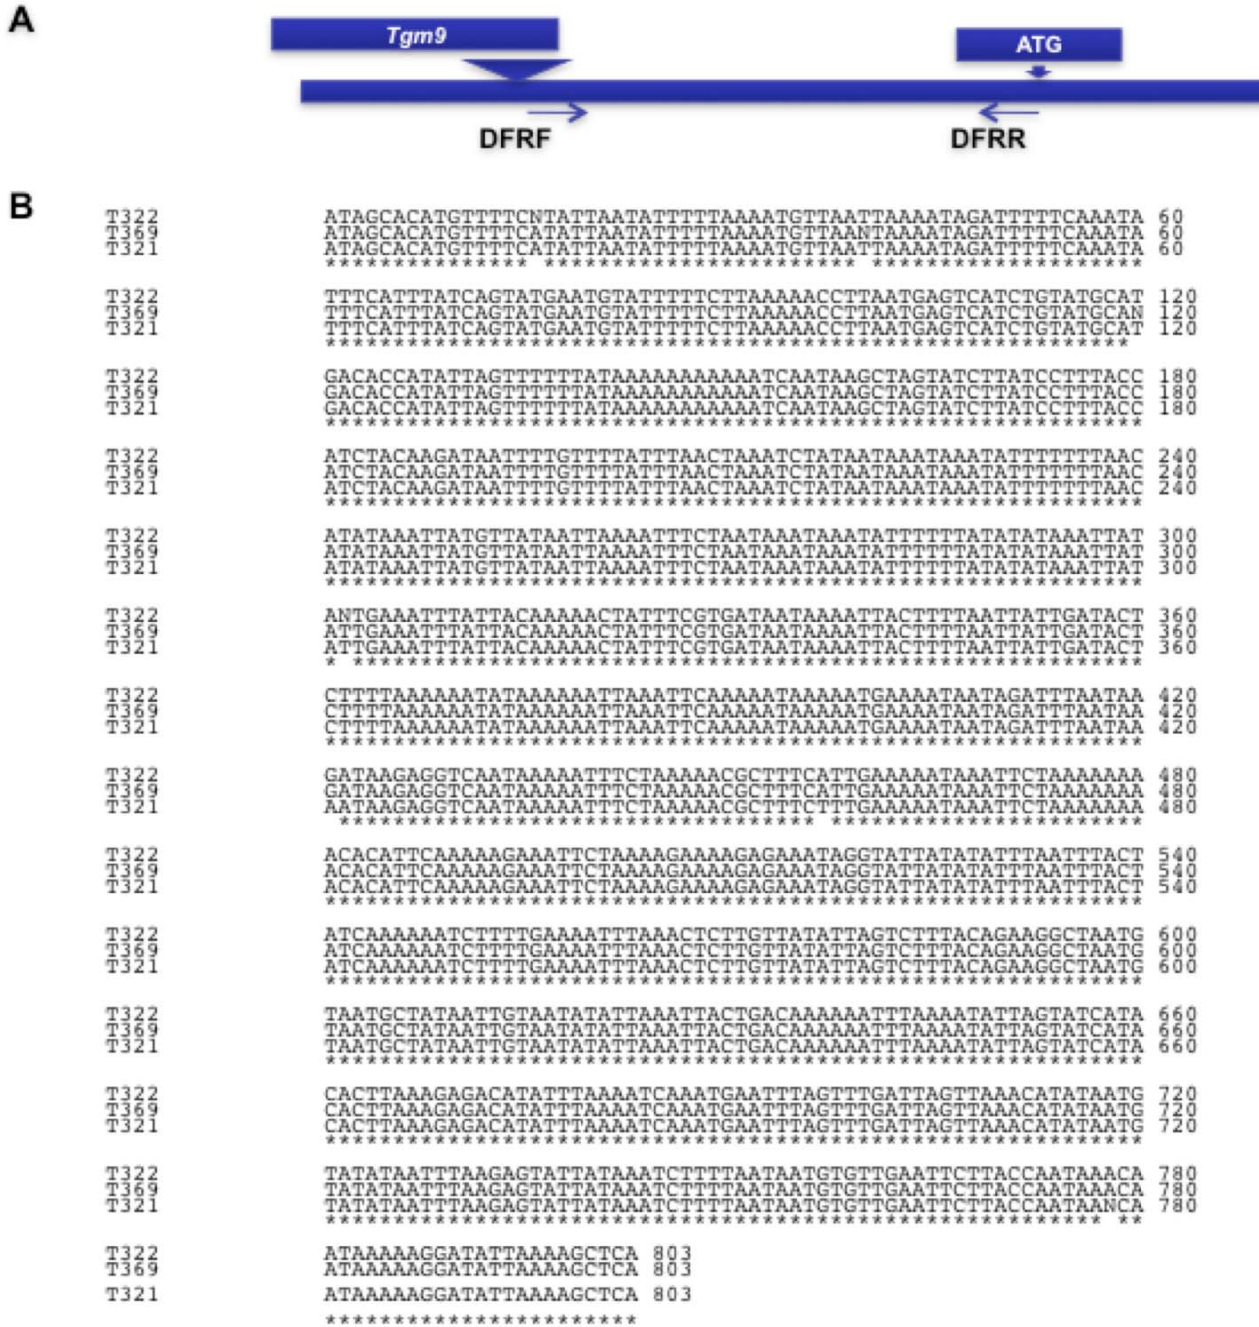

FIGURE S6. —Promoters of *w4-dp* (T321) and *w4-p* (T369) alleles were intact following insertion of *Tgm9*. (A) Schematic representation of the promoter region amplified by PCR is shown. Inverted triangle showed the *Tgm9* insertion site. (B) PCR amplified promoter sequences of parental line T322 (*w4-m*) and two stable mutants *w4-dp* (T321) and *w4-p* (T369) are compared. Primer DFRF, CCTATGCCATGTGAGAATAAAGCAG; Primer DFRR, CCGTATGAAGTGGGTGCTTTTATAG.
