# Supplementary material for: Excision of an Active CACTA-Like Transposable Element From DFR2 Causes Variegated Flowers in Soybean [Glycine max (L.) Merr.]
Source: Oxford University Press journal article supplement (doi:10.1534/genetics.109.107904), 2009-11-07
Supplement: figures7.pdf [file figures7.pdf]

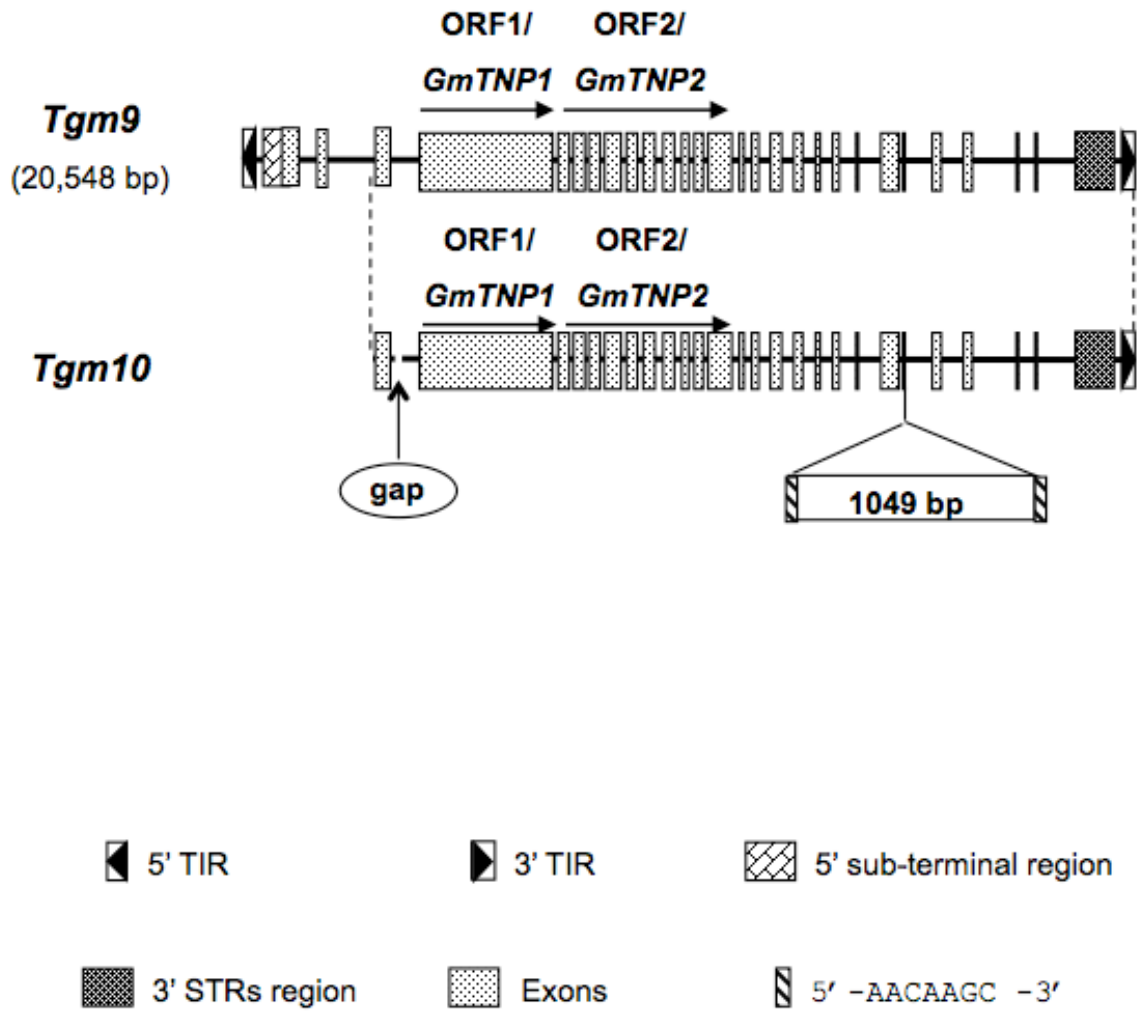

FIGURE S7.—Schematic representation of *Tgm10*. *Tgm10* is located at the 3' end of Scaffold\_57. Except for a ~4100bp deletion in 5' end, a gap in 5' end, and a 1049 bp insertion flanked with a 7 bp direct repeat in exon XXIII, *Tgm10* is 99% identical to *Tgm9* element.
