# Supplementary material for: Excision of an Active CACTA-Like Transposable Element From DFR2 Causes Variegated Flowers in Soybean [Glycine max (L.) Merr.]
Source: Oxford University Press journal article supplement (doi:10.1534/genetics.109.107904), 2009-11-07
Supplement: tables1.pdf [file tables1.pdf]

**TABLE S1**  
**Primers used in this study**

| Primer <sup>a</sup> | Sequence                              |
|---------------------|---------------------------------------|
| ANS1S               | 5'-ATGCACCTTGGTGAACCATGG-3'           |
| DFR1S               | 5'-ATCTTGCTGAAGAGGGAAGC-3'            |
| DFR2S               | 5'-ACAACGAGAGAGAGAACATG-3'            |
| DFR3S               | 5'-AGCCTACAATAAACGGATTG-3'            |
| DFR4S               | 5'-CCCGTTCTTCTATCTTTTTTCTG-3'         |
| Tn3'1S              | 5'-GGTTGCAGGAGAAAACCGTCTTAGTATGTC-3'  |
| Tn3'2S              | 5'-CGGTTTTTCGTAACAATCGTC-3'           |
| P1                  | 5'CCCAATCCAAGCTGCGACCTTCAAAG-3'       |
| P3                  | 5'-GGACGAGCCTTTCATCATGGCAGCAC-3'      |
| ANS1R               | 5'-AATGCTCTTGTACTTGCCGTTG-3'          |
| DFR1R               | 5'-TGTACATGTCCTCTAAGCTG-3'            |
| DFR2R               | 5'-TCCCTCTTGAGCAAGATCAG-3'            |
| DFR3R               | 5'-ATGATATGGTAATGGGACTC-3'            |
| DFR4R               | 5'-GGACAAAGACAATGCAGGTCCACATCGAAG-3'  |
| Tn3'1R              | 5'-GACATTCATGTATTCACTAGTACAAATAAAG-3' |
| P2                  | 5'-CGCCAGAACCCACTTTGTAGCGTGAC-3'      |
| P4                  | 5'-GCTCCCATGTTTGCTGCTCCATACCA-3'      |
| P5                  | 5'-CTGATGCAAGTATGCTCCTAAGTAC-3'       |

<sup>a</sup> Primers used for sequencing the element are not listed here. ANS1F and ANS1R were designed from a partial coding sequence of an *ANS* gene identified from soybean seed coats (AF325853). DFR1F and DFR1R were designed according to the consensus sequence of three legume *DFR* genes (AF167556 from *G. max*; AF117263 from *Lotus corniculatus*; and AY389346 from *Medicago truncatula*).
