# Supplementary material for: Excision of an Active CACTA-Like Transposable Element From DFR2 Causes Variegated Flowers in Soybean [Glycine max (L.) Merr.]
Source: Oxford University Press journal article supplement (doi:10.1534/genetics.109.107904), 2009-11-07
Supplement: tables2.pdf [file tables2.pdf]

**TABLE S2****Probes used in this study**

| Probe <sup>a</sup>       | Description                                                                                                                                                      |
|--------------------------|------------------------------------------------------------------------------------------------------------------------------------------------------------------|
| <i>ANS</i> partial cDNA  | cDNA fragment amplified from purple petals of T322 using ANS1F and ANS1R primers.                                                                                |
| <i>F3H</i>               | An <i>F3H</i> EST clone (BM093886) provided by Dr. R. C. Shoemaker (Ames, IA)                                                                                    |
| <i>DFR2</i> partial cDNA | cDNA fragment amplified from petals of T322 using DFR1F and DFR1R primers.                                                                                       |
| DFR 5'                   | cDNA fragment amplified from petals of T322 using DFR2S and DFR2R primers.                                                                                       |
| DFR3'                    | cDNA fragment amplified from petals of T322 using DFR3S and DFR3R primers.                                                                                       |
| <i>Tgm9</i> 3' end       | PCR fragment amplified using primers TN3'2S and TN3'1R from a lambda clone containing the <i>w4-m</i> allele, isolated from the 1st T322 lambda genomic library. |

<sup>a</sup> All the probes were labeled with  $\alpha$ -<sup>32</sup>P-dATP using Primer-it II randomly labeling kit (Stratagene, La Jolla, CA).
