# Supplementary material for: Excision of an Active CACTA-Like Transposable Element From DFR2 Causes Variegated Flowers in Soybean [Glycine max (L.) Merr.]
Source: Oxford University Press journal article supplement (doi:10.1534/genetics.109.107904), 2009-11-07
Supplement: tables3.pdf [file tables3.pdf]

**TABLE S3****Polymorphic sequences between *Tgm9* and *Tgmt\****

| Nucleotide position in <i>Tgm9</i> | Nucleotide in <i>Tgm9</i> | Nucleotide in <i>Tgmt*</i> <sup>a</sup> |
|------------------------------------|---------------------------|-----------------------------------------|
| 293 (5' STR Exon 1)                | T                         | Y                                       |
| 746 (Intron 1)                     | C                         | Y                                       |
| 920 (Intron 2)                     | C                         | Y                                       |
| 1645 (Intron 2)                    | T                         | C                                       |
| 2043 (Intron 2)                    | T                         | C                                       |
| 2192 (Intron 2)                    | T                         | A                                       |
| 2146 (Intron 2)                    | T                         | C                                       |
| 2923 (Intron 2)                    | T                         | -                                       |
| 4969 (Intron 3)                    | A                         | G                                       |
| 5129 (Intron 3)                    | T                         | C                                       |
| 5272 (Intron 3)                    | T                         | -                                       |
| 5715 (Intron 3)                    | T                         | C                                       |
| 5851 (Intron 3)                    | T                         | -                                       |
| 5863 (Intron 3)                    | T                         | -                                       |
| 5999 (Intron 3)                    | T                         | C                                       |
| 6651 (Exon 4)                      | A                         | G                                       |
| 6819 (Exon 4)                      | C                         | Y                                       |
| 8010 (Exon 4)                      | G                         | R                                       |
| 8019 (Exon 4)                      | C                         | Y                                       |
| 8078 (Exon 4)                      | C                         | Y                                       |
| 13359 (Intron 16)                  | T                         | C                                       |
| 13524 (Exon 17)                    | A                         | G                                       |
| 13616 (Exon 17)                    | A                         | G                                       |
| 13904 (Exon 18)                    | G                         | A                                       |
| 15519 (Intron 21)                  | T                         | C                                       |
| 17169 (Exon25)                     | A                         | G                                       |

<sup>a</sup> "-" represents nucleotide missing
