# Supplementary material for: Excision of an Active CACTA-Like Transposable Element From DFR2 Causes Variegated Flowers in Soybean [Glycine max (L.) Merr.]
Source: Oxford University Press journal article supplement (doi:10.1534/genetics.109.107904), 2009-11-07
Supplement: tables4.pdf [file tables4.pdf]

**TABLE S4****Comparison of 3' terminal inverted repeats among soybean transposable elements**

| Transposon          | 3' TIR <sup>a</sup>                           | Identity to <i>Tgm9</i> |
|---------------------|-----------------------------------------------|-------------------------|
| <i>Tgm9</i>         | 5'- <b>CACTACTACAAATAAAGCTTTTTAAGTCGG</b> -3' | 100%                    |
| <i>Tgmt*</i>        | 5'- <b>CACTACTACAAATAAAGCTTTTTAAGTCGG</b> -3' | 100%                    |
| <i>Tgm-express1</i> | 5'- <b>CACTACTACAAAAGAGGTTTTTTAAGTCGG</b> -3' | 87%                     |
| <i>Tgm1</i>         | 5'- <b>CACTATTACAAAAAGTAGTTTTAACATCGG</b> -3' | 70%                     |
| <i>Tgm6</i>         | 5'- <b>CACTACTACAAAAGCAGTTTTAACATCGA</b> -3'  | 70%                     |

<sup>a</sup> Nucleotides in bold are identical to the ones in *Tgm9* 3'TIR.
